# Supplementary material for: Spatial and Temporal Characteristics of Phytoplankton Communities in Drinking Water Source Reservoirs in Shenzhen, China
Source: MDPI journal article supplement (doi:10.3390/plants12233933), 2023-11-22
Supplement: s1 [file s1]

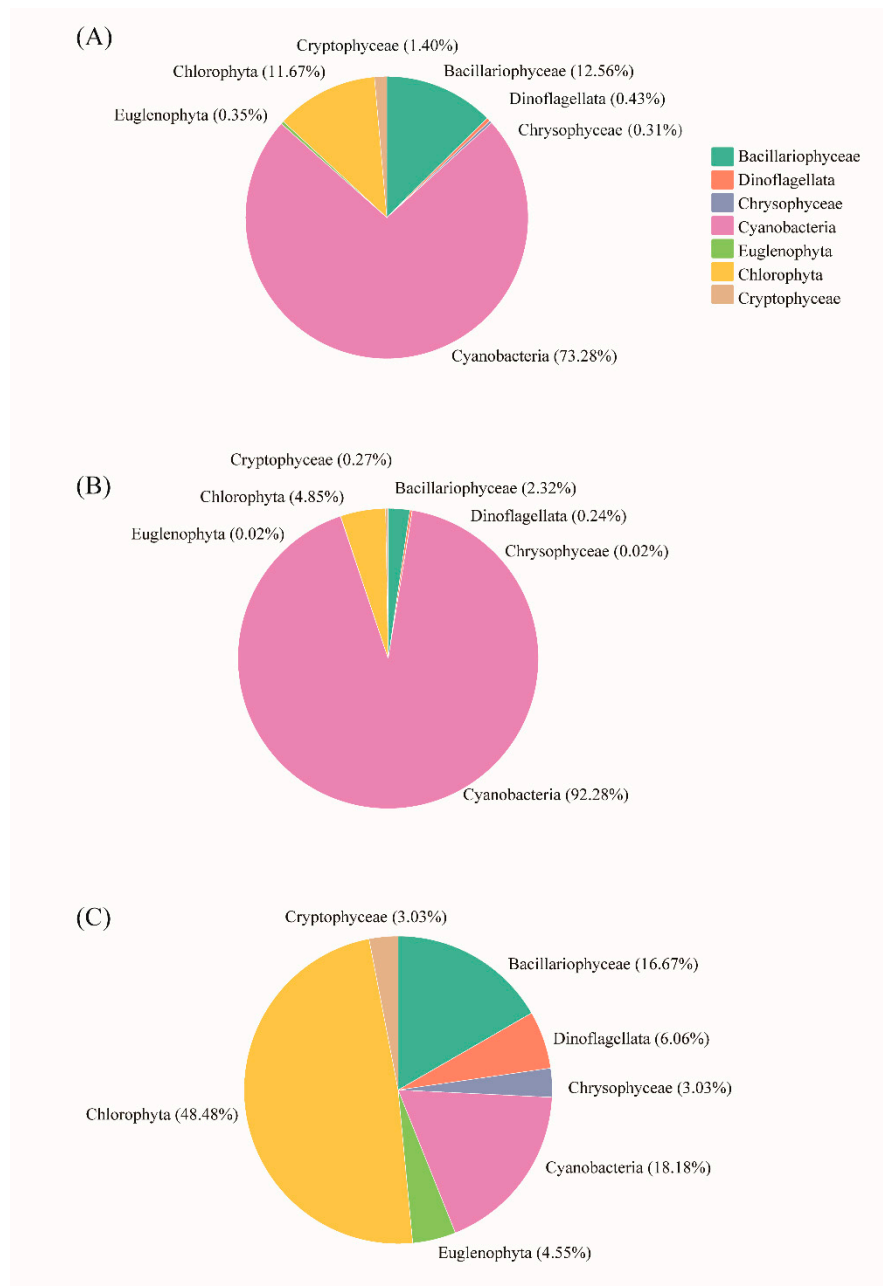

**Figure S1.** Phytoplankton situation. (A) Phytoplankton density during the dry season; (B) Phytoplankton density during the wet season; (C) Number of genera of species in 7 classification units.

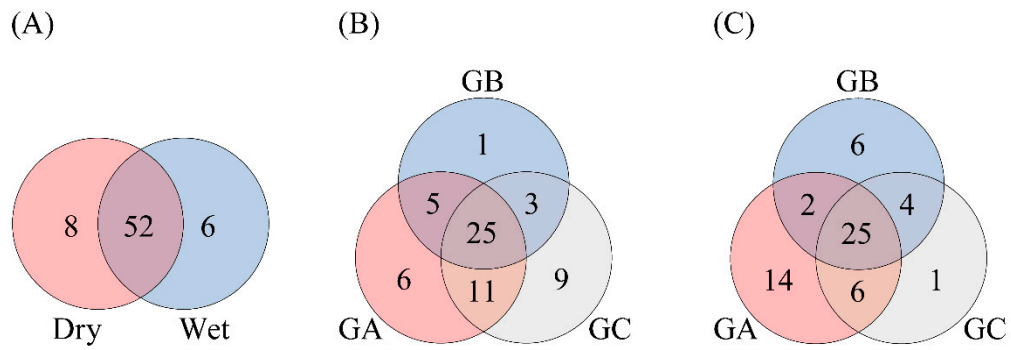

**Figure S2.** Venn diagram. (A) Venn diagram showing phytoplankton distribution during dry and wet season. Dry represents dry season, Wet represents wet season; (B) Venn diagram showing the distribution of phytoplankton at different group in the dry season. GA, Group A; GB, Group B; GC, Group C; GD, Group D; (C) Venn diagram showing the distribution of phytoplankton at different group in the Wet season. GA, Group A; GB, Group B; GC, Group C; GD, Group D.

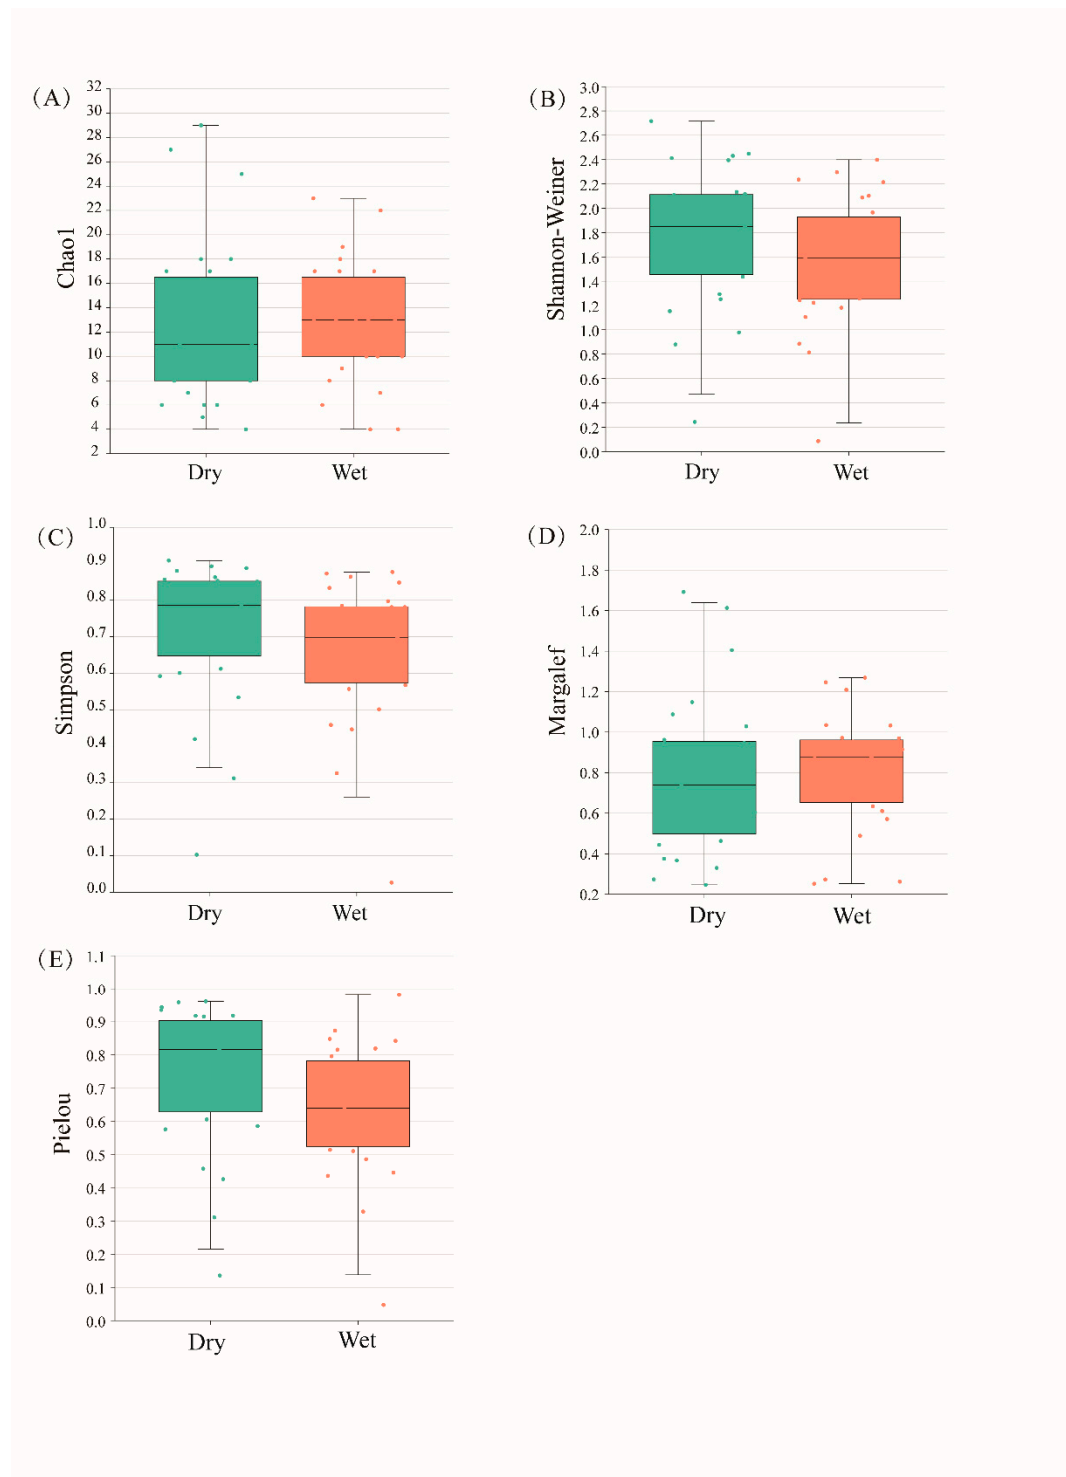

**Figure S3.**  $\alpha$  diversity analysis results of 27 reservoirs. Dry represents dry season, Wet represents wet season. (A) Chao1 index; (B) Shannon-Wiener index; (C) Simpson index; (D) Margalef index; (J) Pielou index.

**Table S2.** Reservoir groupings and abbreviations

| Group | Reservoirs         | Abbreviated name |
|-------|--------------------|------------------|
| A     | Dakeng             | DK               |
|       | Damali             | DML              |
|       | Dongzi             | DZ               |
|       | Fengmulang         | FML              |
|       | Jingxin            | JX               |
|       | Ling'ao            | LA               |
|       | Luowutian          | LWT              |
|       | Xiangche           | XC               |
|       | Qingjing           | QLJ              |
|       | Tongluojing        | TLJ              |
|       | Chiao              | CA               |
|       | Honghualingshangku | HHLSK            |
|       | Honghualingxiaku   | HHLXK            |
|       | Shangdongao        | SDA              |
| B     | Songzikeng         | SZK              |
|       | Sanzhoutian        | SZT              |
|       | Meilin             | ML               |
|       | Longkou            | LK               |
|       | Shenzhen           | SZ               |
| C     | Changlingpi        | CLP              |
|       | Xili               | XL               |
|       | Luotian            | LT               |
|       | Shiyan             | SY               |
|       | Teigang            | TG               |
|       | Ejing              | EJ               |
|       | Gongming           | GM               |
|       | Xikeng             | XK               |

**Table S3.** Percentage similarity of phytoplankton (SIMPER) analysis of drinking water source reservoirs in Shenzhen(top 20).

| Genus                         | Average | SD      | Ratio | Cumsum |
|-------------------------------|---------|---------|-------|--------|
| <i>Pseudoanabaena</i> sp.     | 0.19084 | 0.22683 | 0.841 | 0.214  |
| <i>Microcystis</i> sp.        | 0.11071 | 0.24517 | 0.452 | 0.339  |
| <i>Melosira</i> sp.           | 0.05271 | 0.12443 | 0.424 | 0.398  |
| <i>Cylindrospermopsis</i> sp. | 0.04981 | 0.0748  | 0.666 | 0.454  |
| <i>Coelastrum</i> sp.         | 0.04153 | 0.1138  | 0.365 | 0.501  |
| <i>Limnothrix</i> sp.         | 0.03736 | 0.08582 | 0.435 | 0.543  |
| <i>Scenedesmus</i> .sp.       | 0.0344  | 0.03917 | 0.878 | 0.581  |
| <i>Cyclotella</i> sp.         | 0.03028 | 0.05029 | 0.602 | 0.616  |
| <i>Oscillatoria</i> sp.       | 0.02382 | 0.10644 | 0.224 | 0.642  |
| <i>Dolichospermum</i> sp.     | 0.02344 | 0.06189 | 0.379 | 0.669  |
| <i>Nephrocytium</i> sp.       | 0.02331 | 0.07467 | 0.312 | 0.695  |
| <i>Chlorella</i> sp.          | 0.02241 | 0.03706 | 0.605 | 0.72   |
| <i>Aphanizomenon</i> sp.      | 0.02206 | 0.05117 | 0.431 | 0.745  |
| <i>Cryptomonas</i> sp.        | 0.01833 | 0.04222 | 0.434 | 0.765  |
| <i>Ankistrodesmus</i> sp.     | 0.0148  | 0.0294  | 0.503 | 0.782  |
| <i>Peridinium</i> sp.         | 0.01192 | 0.02375 | 0.502 | 0.795  |
| <i>Staurastrum</i> sp.        | 0.01088 | 0.02942 | 0.37  | 0.808  |
| <i>Rhizosolenia</i> sp.       | 0.01079 | 0.03208 | 0.336 | 0.82   |
| <i>Crucigenia</i> sp.         | 0.00937 | 0.03257 | 0.288 | 0.83   |

Table S4 P-values and R-values for intergroup correlation analysis.

| Dry season                      |                     |                |                 |                |                  |                 |                 |                     |                |                 |                |                  |                 |                 |
|---------------------------------|---------------------|----------------|-----------------|----------------|------------------|-----------------|-----------------|---------------------|----------------|-----------------|----------------|------------------|-----------------|-----------------|
|                                 | pValue              |                |                 |                |                  |                 |                 |                     | rValue         |                 |                |                  |                 |                 |
|                                 | Bacillar<br>iophyta | Pyrroph<br>yta | Chrysop<br>hyta | Cyanop<br>hyta | Eugleno<br>phyta | Chlorop<br>hyta | Cryptop<br>hyta | Bacillar<br>iophyta | Pyrroph<br>yta | Chrysop<br>hyta | Cyanop<br>hyta | Eugleno<br>phyta | Chlorop<br>hyta | Cryptop<br>hyta |
| WT                              | 0.4579              | 0.8011         | 0.1163          | 0.2366         | 0.4433           | 0.4570          | 0.3079          | -0.1491             | -0.0509        | -0.3094         | 0.2357         | 0.1539           | -0.1494         | -0.2038         |
| pH                              | 0.0138              | 0.2351         | 0.1652          | 0.0068         | 0.0056           | 0.1234          | 0.4141          | 0.4682              | -0.2364        | -0.2749         | 0.5084         | 0.5183           | 0.3038          | 0.1639          |
| DO                              | 0.3882              | 0.6991         | 0.2295          | 0.9710         | 0.2905           | 0.5790          | 0.5127          | 0.1730              | -0.0780        | -0.2392         | -0.0073        | 0.2111           | 0.1117          | 0.1317          |
| TUR                             | 0.7289              | 0.8944         | 0.1202          | 0.1270         | 0.1699           | 0.7994          | 0.1521          | 0.0699              | 0.0268         | -0.3063         | 0.3011         | 0.2720           | 0.0513          | 0.2833          |
| TRA                             | 0.0065              | 0.3910         | 0.0261          | 0.0001         | 0.1591           | 0.0259          | 0.1063          | -0.5105             | 0.1720         | 0.4277          | -0.6777        | -0.2788          | -0.4282         | -0.3177         |
| NH <sub>4</sub> <sup>+</sup> -N | 0.2416              | 0.5073         | 0.6718          | 0.1273         | 0.2668           | 0.9697          | 0.6090          | 0.2332              | 0.1333         | 0.0854          | 0.3008         | 0.2215           | 0.0077          | 0.1030          |
| TN                              | 0.0017              | 0.0416         | 0.0269          | 0.0201         | 0.0299           | 0.2333          | 0.1896          | 0.5745              | -0.3946        | -0.4255         | 0.4449         | 0.4183           | 0.2373          | 0.2604          |
| TP                              | 0.2956              | 0.1323         | 0.6817          | 0.3960         | 0.4722           | 0.3975          | 0.7475          | 0.2089              | -0.2971        | 0.0827          | -0.1702        | 0.1444           | 0.1697          | 0.0650          |
| COD <sub>Mn</sub>               | 0.0000              | 0.6380         | 0.2731          | 0.0002         | 0.0621           | 0.0096          | 0.0765          | 0.7698              | -0.0948        | -0.2187         | 0.6623         | 0.3638           | 0.4891          | 0.3466          |
| Chla                            | 0.0000              | 0.9856         | 0.1383          | 0.0000         | 0.0267           | 0.0004          | 0.0359          | 0.7295              | 0.0036         | -0.2928         | 0.7269         | 0.4260           | 0.6326          | 0.4054          |
| TLI                             | 0.0000              | 0.3835         | 0.1545          | 0.0002         | 0.0030           | 0.0019          | 0.0391          | 0.7869              | -0.1747        | -0.2817         | 0.6590         | 0.5487           | 0.5697          | 0.3993          |

  

| Wet season |                     |                |                 |                |                  |                 |                 |                     |                |                 |                |                  |                 |                 |
|------------|---------------------|----------------|-----------------|----------------|------------------|-----------------|-----------------|---------------------|----------------|-----------------|----------------|------------------|-----------------|-----------------|
|            | pValue              |                |                 |                |                  |                 |                 |                     | rValue         |                 |                |                  |                 |                 |
|            | Bacillar<br>iophyta | Pyrroph<br>yta | Chrysop<br>hyta | Cyanop<br>hyta | Eugleno<br>phyta | Chlorop<br>hyta | Cryptop<br>hyta | Bacillar<br>iophyta | Pyrroph<br>yta | Chrysop<br>hyta | Cyanop<br>hyta | Eugleno<br>phyta | Chlorop<br>hyta | Cryptop<br>hyta |
| WT         | 0.7701              | 0.5876         | 0.6680          | 0.4668         | 0.8838           | 0.0467          | 0.2843          | 0.0590              | 0.1092         | -0.0865         | 0.1462         | 0.0295           | 0.3860          | 0.2138          |
| pH         | 0.0279              | 0.6468         | 0.1948          | 0.0004         | 0.7530           | 0.0133          | 0.0004          | 0.4231              | 0.0924         | -0.2575         | 0.6307         | -0.0635          | 0.4702          | 0.6293          |
| DO         | 0.1989              | 0.3394         | 0.1162          | 0.0209         | 0.5681           | 0.0362          | 0.0434          | 0.2552              | 0.1912         | -0.3095         | 0.4421         | 0.1149           | 0.4048          | 0.3915          |
| TUR        | 0.1817              | 0.6868         | 0.0424          | 0.0381         | 0.5759           | 0.0519          | 0.0295          | 0.2650              | -0.0813        | -0.3933         | 0.4011         | 0.1127           | 0.3780          | 0.4193          |

|                                 |        |        |        |        |        |        |        |         |         |         |         |         |         |         |
|---------------------------------|--------|--------|--------|--------|--------|--------|--------|---------|---------|---------|---------|---------|---------|---------|
| TRA                             | 0.0278 | 0.6370 | 0.0273 | 0.0009 | 0.7944 | 0.0206 | 0.0006 | -0.4233 | 0.0951  | 0.4245  | -0.6030 | 0.0526  | -0.4432 | -0.6203 |
| NH <sub>4</sub> <sup>+</sup> -N | 0.9865 | 0.1322 | 0.8210 | 0.9754 | 0.0488 | 0.8862 | 0.5118 | -0.0034 | -0.2972 | 0.0457  | -0.0062 | -0.3827 | 0.0289  | -0.1319 |
| TN                              | 0.0014 | 0.2495 | 0.2339 | 0.0034 | 0.1086 | 0.1129 | 0.1146 | 0.5821  | -0.2295 | -0.2370 | 0.5431  | -0.3158 | 0.3122  | 0.3108  |
| TP                              | 0.0061 | 0.4151 | 0.0869 | 0.0012 | 0.0992 | 0.0440 | 0.1528 | 0.5143  | -0.1635 | -0.3357 | 0.5893  | -0.3240 | 0.3906  | 0.2829  |
| COD <sub>Mn</sub>               | 0.0565 | 0.2012 | 0.8191 | 0.0000 | 0.5923 | 0.0066 | 0.0005 | 0.3713  | 0.2540  | -0.0462 | 0.7284  | 0.1079  | 0.5094  | 0.6214  |
| Chla                            | 0.0001 | 0.5389 | 0.3161 | 0.0000 | 0.6300 | 0.0004 | 0.0006 | 0.6717  | 0.1237  | -0.2005 | 0.7499  | -0.0971 | 0.6369  | 0.6205  |
| TLI                             | 0.0126 | 0.8404 | 0.1984 | 0.0001 | 0.5415 | 0.0171 | 0.0106 | 0.4824  | 0.0415  | -0.2607 | 0.6981  | -0.1254 | 0.4633  | 0.4926  |

Group B

|                                 | pValue              |                |                 |                |                  |                 |                 | rValue              |                |                 |                |                  |                 |                 |
|---------------------------------|---------------------|----------------|-----------------|----------------|------------------|-----------------|-----------------|---------------------|----------------|-----------------|----------------|------------------|-----------------|-----------------|
|                                 | Bacillar<br>iophyta | Pyrroph<br>yta | Chrysop<br>hyta | Cyanop<br>hyta | Eugleno<br>phyta | Chlorop<br>hyta | Cryptop<br>hyta | Bacillar<br>iophyta | Pyrroph<br>yta | Chrysop<br>hyta | Cyanop<br>hyta | Eugleno<br>phyta | Chlorop<br>hyta | Cryptop<br>hyta |
| WT                              | 0.3736              | 0.8809         | 0.8868          | 0.1869         | 0.7353           | 0.7892          | 0.4657          | -0.3161             | 0.0546         | 0.0519          | 0.4545         | -0.1228          | -0.0973         | 0.2614          |
| pH                              | 0.8022              | 0.2397         | 0.5816          | 0.3104         | 0.7353           | 0.5784          | 0.5096          | 0.0912              | -0.4097        | -0.1989         | 0.3576         | -0.1228          | 0.2006          | 0.2371          |
| DO                              | 0.9601              | 0.2755         | 0.6155          | 0.6515         | 0.6040           | 0.4874          | 0.2505          | 0.0182              | -0.3824        | -0.1816         | 0.1636         | 0.1875           | 0.2492          | 0.4012          |
| TUR                             | 0.6021              | 0.7068         | 0.1033          | 0.0008         | 0.0818           | 0.7253          | 0.3001          | -0.1885             | -0.1366        | -0.5449         | 0.8788         | -0.5754          | -0.1277         | -0.3647         |
| TRA                             | 0.8277              | 0.2381         | 0.1021          | 0.0072         | 0.0807           | 0.9334          | 0.3482          | -0.0793             | 0.4109         | 0.5466          | -0.7842        | 0.5771           | 0.0305          | 0.3323          |
| NH <sub>4</sub> <sup>+</sup> -N | 0.7840              | 0.1135         | 0.6958          | 0.7715         | 0.2139           | 0.7840          | 0.1054          | 0.0997              | 0.5320         | 0.1419          | 0.1056         | -0.4308          | -0.0997         | -0.5422         |
| TN                              | 0.1921              | 0.0518         | 0.0294          | 0.7261         | 0.7353           | 0.4339          | 0.8807          | 0.4499              | -0.6282        | -0.6833         | 0.1273         | -0.1228          | 0.2796          | -0.0547         |
| TP                              | 0.2658              | 0.1291         | 0.1354          | 0.8272         | 0.8438           | 0.2740          | 0.8862          | 0.3896              | -0.5134        | -0.5063         | 0.0795         | 0.0718           | 0.3834          | -0.0521         |
| COD <sub>Mn</sub>               | 0.1927              | 0.3706         | 0.9426          | 0.0560         | 0.4088           | 0.5042          | 0.6839          | -0.4492             | 0.3180         | -0.0263         | 0.6197         | -0.2945          | -0.2400         | -0.1477         |
| Chla                            | 0.0596              | 0.4145         | 0.1054          | 0.5208         | 0.0986           | 0.1223          | 0.5423          | 0.6128              | -0.2911        | -0.5423         | 0.2310         | -0.5512          | 0.5213          | -0.2195         |
| TLI                             | 0.3833              | 0.0924         | 0.0294          | 0.0897         | 0.5296           | 0.3639          | 0.9867          | 0.3100              | -0.5599        | -0.6833         | 0.5636         | -0.2263          | 0.3222          | -0.0061         |

| Group C                         |                     |                |                 |                |                  |                 |                 |                     |                |                 |                |                  |                 |                 |
|---------------------------------|---------------------|----------------|-----------------|----------------|------------------|-----------------|-----------------|---------------------|----------------|-----------------|----------------|------------------|-----------------|-----------------|
|                                 | pValue              |                |                 |                |                  |                 |                 | rValue              |                |                 |                |                  |                 |                 |
|                                 | Bacillar<br>iophyta | Pyrroph<br>yta | Chrysop<br>hyta | Cyanop<br>hyta | Eugleno<br>phyta | Chlorop<br>hyta | Cryptop<br>hyta | Bacillar<br>iophyta | Pyrroph<br>yta | Chrysop<br>hyta | Cyanop<br>hyta | Eugleno<br>phyta | Chlorop<br>hyta | Cryptop<br>hyta |
| WT                              | 0.6881              | 0.1982         | 0.2648          | 0.0137         | 0.0529           | 0.1985          | 0.8115          | 0.1296              | 0.3995         | -0.3500         | 0.6865         | -0.5703          | 0.3993          | -0.0772         |
| pH                              | 0.5128              | 0.0234         | 0.3339          | 0.1591         | 0.3365           | 0.7954          | 0.5121          | 0.2098              | 0.6454         | -0.3057         | 0.4336         | -0.3041          | 0.0839          | 0.2102          |
| DO                              | 0.0479              | 0.0868         | 0.4954          | 0.5717         | 0.4954           | 0.7456          | 0.1817          | 0.5804              | 0.5148         | -0.2184         | 0.1818         | -0.2183          | 0.1049          | 0.4133          |
| TUR                             | 0.1063              | 0.2783         | 0.8928          | 0.6331         | 0.5603           | 0.9484          | 0.9483          | -0.4895             | 0.3408         | -0.0437         | 0.1538         | 0.1872           | 0.0210          | -0.0210         |
| TRA                             | 0.0296              | 0.3271         | 0.5851          | 0.0879         | 0.5171           | 0.5324          | 0.5539          | 0.6257              | -0.3098        | 0.1756          | -0.5132        | 0.2077           | -0.2004         | 0.1901          |
| NH <sub>4</sub> <sup>+</sup> -N | 0.9044              | 0.1480         | 0.2593          | 0.0549         | 0.0122           | 0.8269          | 0.3292          | -0.0389             | -0.4442        | 0.3537          | -0.5664        | 0.6948           | -0.0708         | -0.3085         |
| TN                              | 0.0071              | 0.6031         | 0.4938          | 0.3346         | 0.9519           | 0.6795          | 0.6391          | 0.7298              | -0.1674        | -0.2191         | -0.3053        | 0.0196           | -0.1333         | 0.1511          |



|                   |        |        |        |        |        |        |        |        |         |         |         |         |         |        |
|-------------------|--------|--------|--------|--------|--------|--------|--------|--------|---------|---------|---------|---------|---------|--------|
| TP                | 0.0044 | 0.2465 | 0.7850 | 0.4051 | 0.2933 | 0.5376 | 0.3243 | 0.7562 | -0.3628 | -0.0883 | -0.2650 | -0.3310 | 0.1979  | 0.3115 |
| COD <sub>Mn</sub> | 0.7575 | 0.9454 | 0.5796 | 0.2257 | 0.4475 | 0.0205 | 0.8513 | 0.0998 | -0.0222 | -0.1781 | -0.3780 | 0.2425  | -0.6561 | 0.0607 |
| Chla              | 0.8454 | 0.6683 | 0.8924 | 0.2738 | 0.1003 | 0.5113 | 0.4927 | 0.0632 | 0.1383  | -0.0438 | -0.3439 | 0.4969  | -0.2105 | 0.2197 |
| TLI               | 0.2356 | 0.6529 | 0.3339 | 0.3423 | 0.2306 | 0.5567 | 0.8627 | 0.3706 | 0.1450  | -0.3057 | -0.3007 | 0.3743  | -0.1888 | 0.0560 |

---
